# Supplementary material
Source: HighWire-hosted journal article supplement (https://jmg.bmj.com/content/jmedgenet-2015-103576)

**Supplementary Figure. Haplotype analysis to investigate a putative founder mutation.**

Genotyping results for markers D2S309, D2S2214, D2S116 and D2S2309 are shown for Patients 1-10 as well as the two previously reported cases documented in the literature (denoted RC1[10] and RC2[9]).

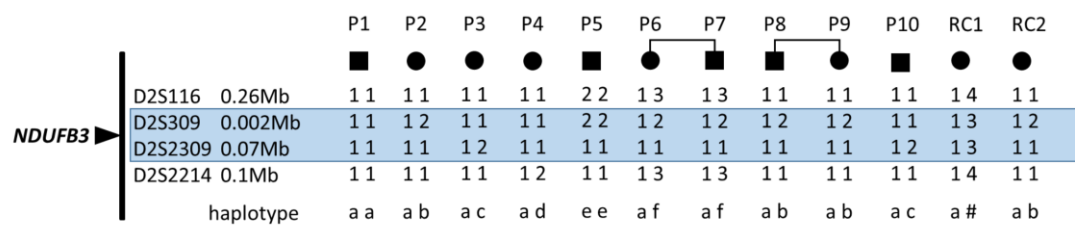

Supplement: inline-supplementary-material-3 [file inline-supplementary-material-3.pdf]
